# Supplementary material for: NRG1 Fusions in KRAS Wild-Type Pancreatic Cancer
Source: Oxford University Press journal article supplement (doi:10.1158/2159-8290.cd-18-0036), 2018-05-25
Supplement: 21598290cd180036-sup-195285_2_supp_4755473_p94h67.docx [file 21598290cd180036-sup-195285_2_supp_4755473_p94h67.docx]

### Supplementary Figure S1. Circos plots.

Circos plots of all patients and the PDCM showing copy-number profiles and predicted structural variants obtained from RNA (red) or DNA (blue) sequencing experiments. Bold lines indicate oncogenic fusions.

| Patient 1  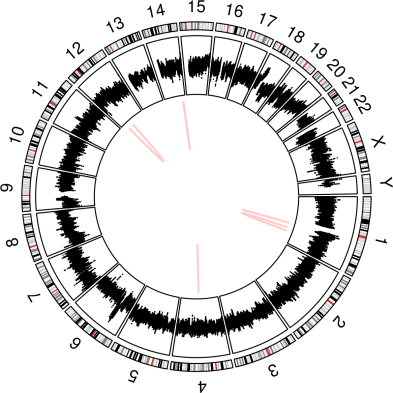 | Patient 2  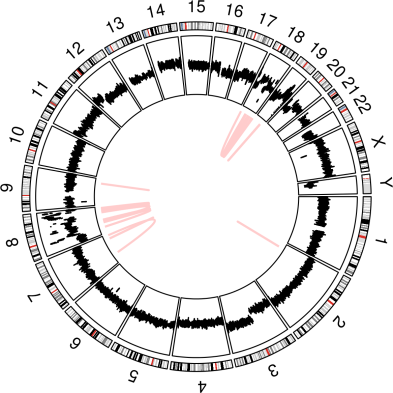 | Patient 3  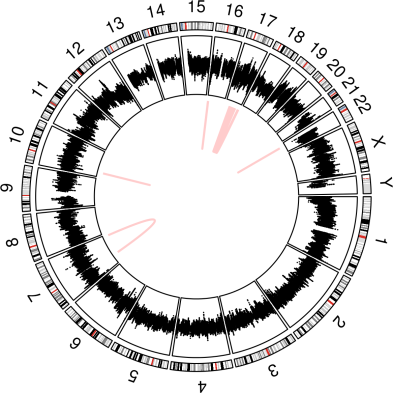 |
| --- | --- | --- |
| Patient 4  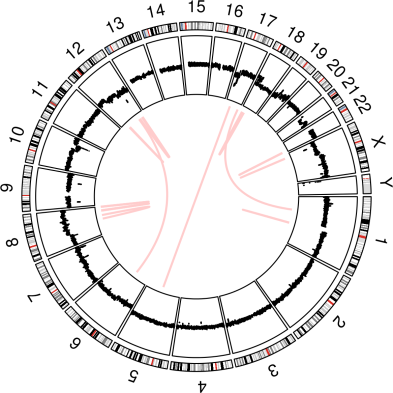 | Patient 5  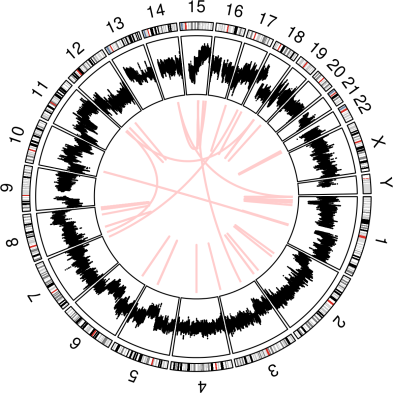 | Patient 6  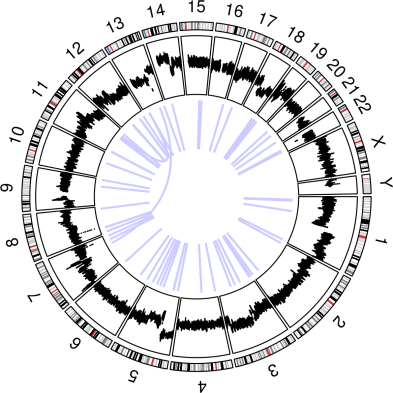 |
| Patient 7  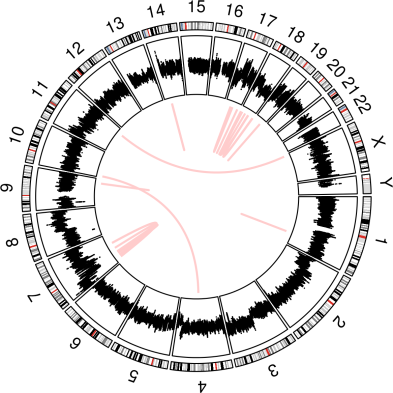 | Patient 8  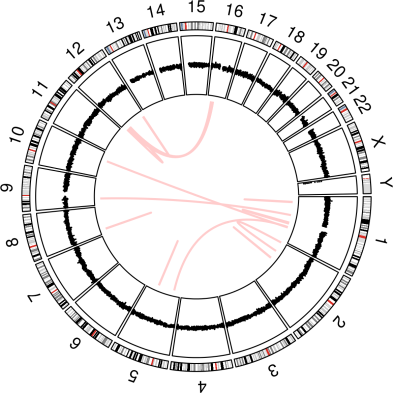 | Patient 9  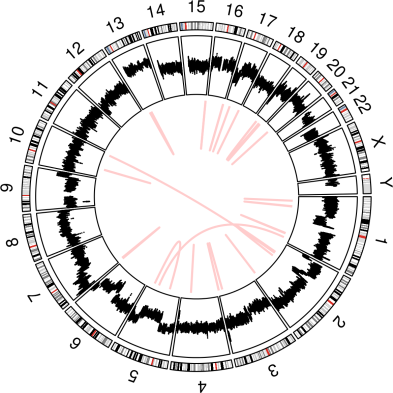 |
| Patient 10  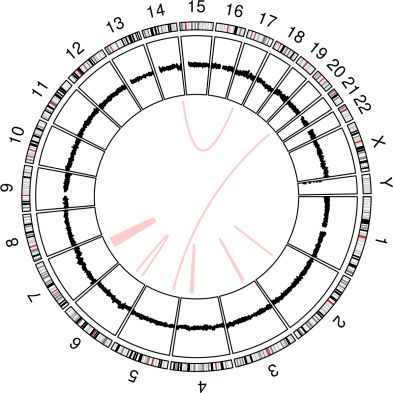 | Patient 11  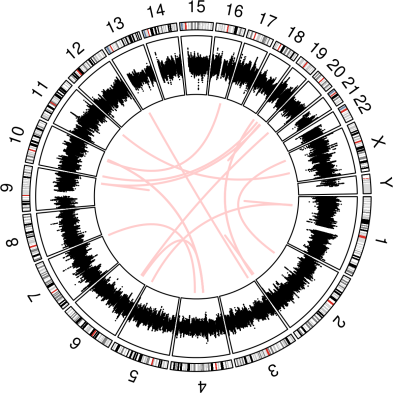 | Patient 12  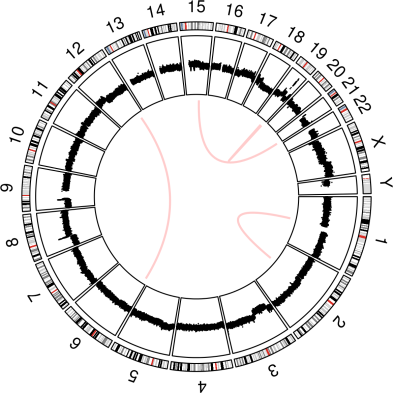 |
| Patient 13  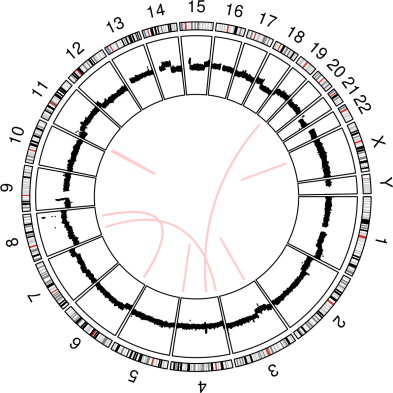 | Patient 14  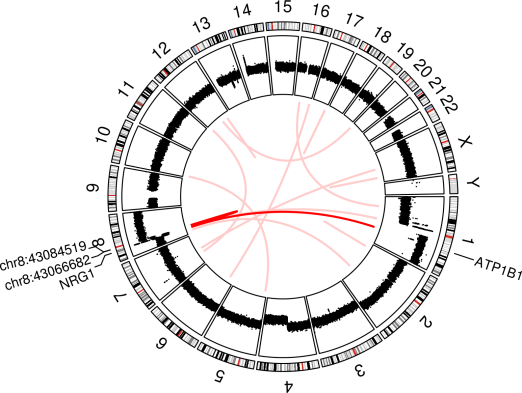 | Patient 15  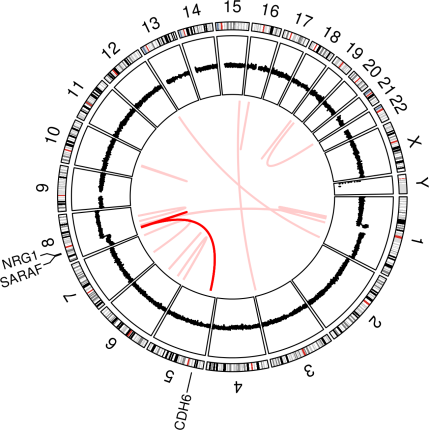 |
| Patient 16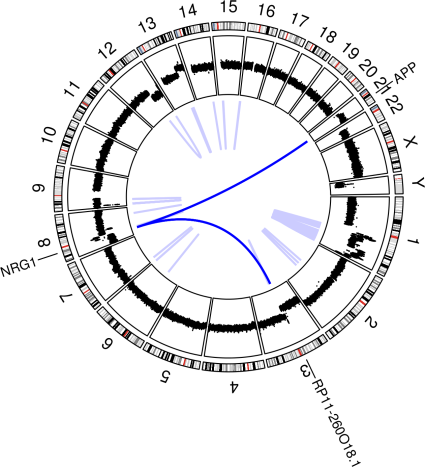 | Patient 17  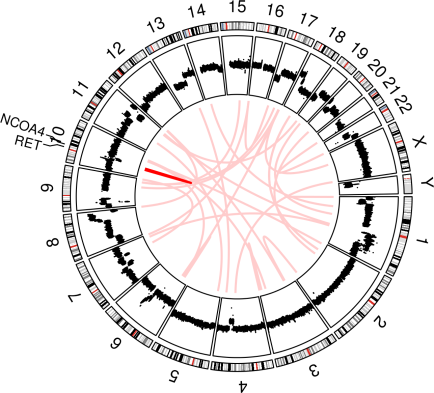 | PDCM  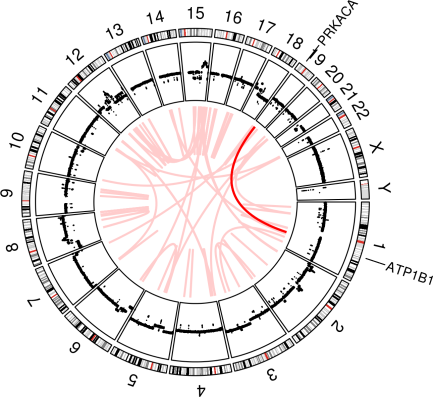 |
