# Supplementary material for: NRG1 Fusions in KRAS Wild-Type Pancreatic Cancer
Source: Oxford University Press journal article supplement (doi:10.1158/2159-8290.cd-18-0036), 2018-05-25
Supplement: 21598290cd180036-sup-195285_2_supp_4755475_p8pn8k.docx [file 21598290cd180036-sup-195285_2_supp_4755475_p8pn8k.docx]

### Supplementary Figure S3. Genomic breakpoints of fusions.

Genomic breakpoints of *NCOA4*-*RET*, *ATP1B1*-*PRKACA, and ATP1B1-NRG1* fusions in KRASwt patients. **A:** *RET* fusion in patient 17. The *RET* rearrangement in patient 17 displayed the canonical fusion architecture involving exons 1-9 of *NCOA4* and exons 12-20 of *RET*, which encode the protein kinase domain facilitating its unregulated activity. **B:** *PRKACA* fusion in the PDCM. **C:** *NRG1* fusion in TCGA-3A-A9I5. The fusion structure resembles that of patient 14 and only differs in the lack of a second breakpoint in *NRG1*.

| A | 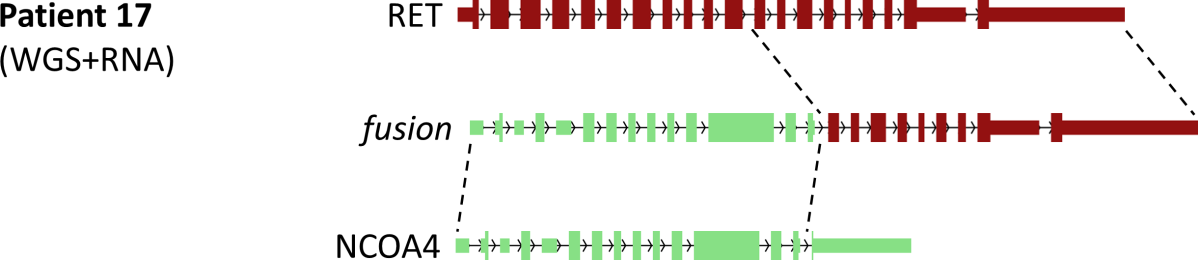 |
| --- | --- |
| B | 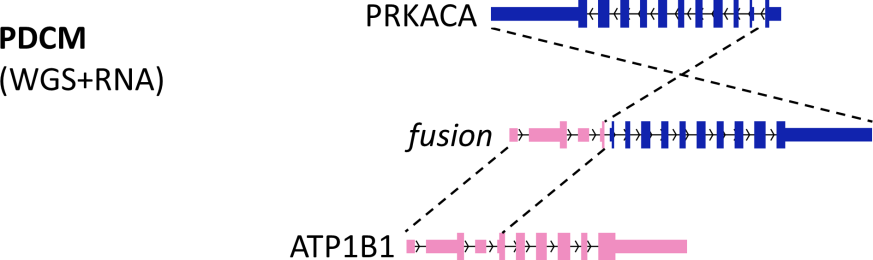 |
| C | 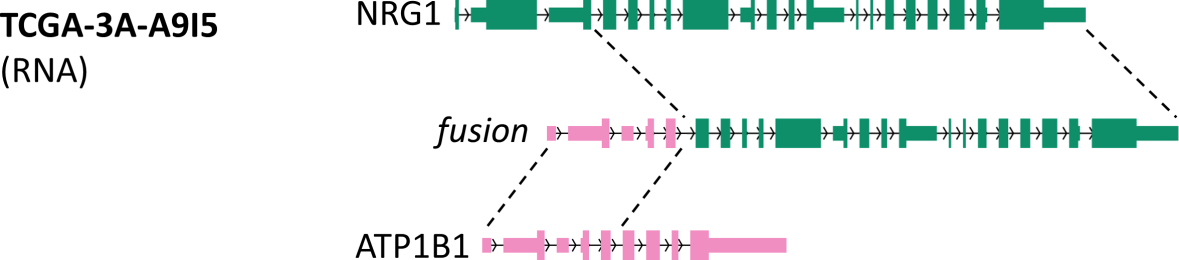 |
