# Supplementary material for: NRG1 Fusions in KRAS Wild-Type Pancreatic Cancer
Source: Oxford University Press journal article supplement (doi:10.1158/2159-8290.cd-18-0036), 2018-05-25
Supplement: 21598290cd180036-sup-195285_2_supp_4755476_p8pn8k.docx [file 21598290cd180036-sup-195285_2_supp_4755476_p8pn8k.docx]

### Supplementary Table S2: Sequencing coverage metrics.

|  | **DNA-seq** | | | | | | **RNA-seq** | |
| --- | --- | --- | --- | --- | --- | --- | --- | --- |
| **Patient** | **Sample** | **Target** | **Total reads** | **Aligned reads (%)** | **Duplicate reads (%)** | **Average on-target read coverage** | **Total reads** | **Aligned reads (%)** |
| 1 | buffy coat | WES | 130254996 | 99.60 | 9.92 | 108.36x | n.a. | n.a. |
| metastasis | WES | 146691610 | 99.47 | 10.36 | 120.11x | 165218978 | 97.36 |
| 2 | buffy coat | WES | 135393500 | 99.25 | 11.58 | 108.2x | n.a. | n.a. |
| metastasis | WES | 156277482 | 99.31 | 9.35 | 128.26x | 176986650 | 98.08 |
| 3 | blood | WES | 76203200 | 99.43 | 3.80 | 69.71x | n.a. | n.a. |
| tumor | WES | 161767502 | 99.55 | 5.89 | 148.91x | 172376216 | 94.03 |
| 4 | buffy coat | WES | 92898610 | 99.49 | 6.83 | 124.65x | n.a. | n.a. |
| metastasis | WES | 121951730 | 99.53 | 7.30 | 160.00x | 189498948 | 97.36 |
| 5 | buffy coat | WES | 101168756 | 99.57 | 4.43 | 137.84 | n.a. | n.a. |
| tumor | WES | 147525838 | 99.58 | 5.13 | 199.10x | 58846630 | 97.67 |
| 6 | buffy coat | WES | 146854458 | 99.33 | 6.15 | 210.58x | n.a. | n.a. |
| metastasis | WES | 212728312 | 99.19 | 7.39 | 285.03x | n.a. | n.a. |
| 7 | buffy coat | WES | 111464172 | 99.59 | 5.19 | 153.29x | n.a. | n.a. |
| metastasis | WES | 117581364 | 99.62 | 6.67 | 161.50x | 144184746 | 97.57 |
| 8 | buffy coat | WES | 107236140 | 99.72 | 5.67 | 147.61x | n.a. | n.a. |
| tumor | WES | 119414954 | 99.72 | 4.11 | 164.02x | 137785004 | 97.78 |
| 9 | buffy coat | WES | 101038062 | 98.72 | 4.32 | 132.07x | n.a. | n.a. |
| metastasis | WES | 140575716 | 98.79 | 6.03 | 185.92x | 93543982 | 95.51 |
| 10 | buffy coat | WES | 103326710 | 99.18 | 4.11 | 145.05x | n.a. | n.a. |
| tumor | WES | 125137962 | 99.18 | 5.14 | 173.55x | 158260094 | 96.93 |
| 11 | blood | WES | 131273948 | 100.00 | 8.90 | 117.19x | n.a. | n.a. |
| metastasis | WES | 163675704 | 100.00 | 9.50 | 148.29x | 120841624 | 97.08 |
| 12 | buffy coat | WGS | 1950084296 | 99.98 | 9.00 | 82.59x | n.a. | n.a. |
| tumor | WGS | 1602896291 | 99.99 | 9.50 | 67.99x | 147013238 | 86.25 |
| 13 | buffy coat | WGS | 1917258693 | 99.95 | 10.50 | 79.77x | n.a. | n.a. |
| metastasis | WGS | 1445293270 | 99.96 | 7.00 | 61.79x | 291139990 | 85.76 |
| 14 | blood | WGS | 1922827208 | 99.98 | 10.10 | 80.81x | n.a. | n.a. |
| tumor | WGS | 1499877323 | 99.99 | 7.80 | 64.69x | 220185686 | 87.12 |
| 15 | blood | WES | 105003589 | 99.98 | 20.40 | 86.13x | n.a. | n.a. |
| tumor | WES | 121747048 | 99.98 | 14.80 | 108.25x | 132039584 | 95.97 |
| 16 | buffy coat | WES | 170903750 | 98.78 | 5.84 | 152.04x | n.a. | n.a. |
| metastasis | WES | 218528420 | 98.88 | 7.88 | 190.44x | n.a. | n.a. |
| buffy coat | WGS | 1873858327 | 100.00 | 9.70 | 79.66x | n.a. | n.a. |
| metastasis | WGS | 1895872329 | 100.00 | 9.50 | 80.14x | n.a. | n.a. |
| 17 | blood | WES | 139200262 | 99.98 | 15.10 | 114.59x | n.a. | n.a. |
| tumor | WES | 215913740 | 99.97 | 12.40 | 179.43x | n.a. | n.a. |
| buffy coat | WGS | 1939602414 | 100.00 | 10.70 | 81.44x | n.a. | n.a. |
| tumor | WGS | 1752383702 | 99.99 | 8.40 | 73.95x | 106504644 | 68.38 |

n.a.=not available
