# Supplementary material for: NRG1 Fusions in KRAS Wild-Type Pancreatic Cancer
Source: Oxford University Press journal article supplement (doi:10.1158/2159-8290.cd-18-0036), 2018-05-25
Supplement: 21598290cd180036-sup-195285_2_supp_4755477_p8pn8k.docx [file 21598290cd180036-sup-195285_2_supp_4755477_p8pn8k.docx]

### Supplementary Table S1: Somatic alterations with potential clinical relevance.

| **Patient** | **Gender** | **Age** | **Molecular alterations with potential clinical relevance** |
| --- | --- | --- | --- |
| 1 | female | 39 | KRAS p.G12R, TP53 p.R748Q, CDKN2A/B del |
| 2 | male | 39 | KRAS p.G12D, GLI2 p.T506M, CDKN2A/B del, FGFR1 amp, MYC amp, NDRG1 amp, SMAD4 del |
| 3 | male | 48 | KRAS p.G12V, CDKN2A p.Y44fs, SMAD4 p.D494fs |
| 4 | male | 40 | KRAS p.G12D, TP53 p.R174X & del, CDKN2A/B del, SMAD4 del |
| 5 | male | 49 | KRAS p.G12D, TP53 splicing |
| 6 | male | 34 | KRAS p.G12R, TP53 p.P239A, NDRG1 p.F77C |
| 7 | male | 39 | KRAS p.G12V, TP53 p.R174X, SMAD4 dup BP-gene |
| 8 | female | 45 | KRAS p.G12V, TP53 p.R196X, DNMT3A p.Q182X |
| 9 | male | 47 | KRAS p.G12V, APC p.E1560X, CDKN2A/B del |
| 10 | female | 36 | KRAS p.G12D, TP53 p.I156F |
| 11 | male | 43 | KRAS p.G12D |
| 12 | male | 49 | KRAS p.G12V, TP53 p.H179Q, AKT2 amp, |
| 13 | male | 37 | KRAS p.G12R, TP53 p.C176F, MYC amp, CDKN2A del |
| 14 | female | 29 | ATP1B1:NRG1:intergenic fus, intergenic:NOTCH2 fus, SMAD4 p.I182V |
| 15 | female | 39 | SARAF:NRG1:CDH6 fus, NRAS dup |
| 16 | male | 24 | APP:NRG1:APP fus, EPHA3 del BP-gene, RIT1 amp, MCL1 amp BP-gene, MDM4 amp |
| 17 | male | 38 | NCOA4:RET fus, CDKN2A/B del, EPHA3 dup BP-gene, ERCC6 del, MLH3 p.T1040G, NDRG1 amp BP-gene, NF2 del, SMAD4 del |

del=deletion, amp=amplification, fs=frameshift, dup=duplication, BP=breakpoint gene, fus=fusion
